# Supplementary material for: Transcriptome Sequencing Analysis Reveals Dynamic Changes in Major Biological Functions during the Early Development of Clearhead Icefish, Protosalanx chinensis
Source: MDPI journal article supplement (doi:10.3390/fishes7030115), 2022-05-21
Supplement: s1 [file s1]

Table S1. DEGs and the prime information of qRT-PCR verification

| Gene                 | Gene ID           | Primer Sequence (5'-3') |                        |
|----------------------|-------------------|-------------------------|------------------------|
|                      |                   | Forward primer          | Reverse primer         |
| <i>prss</i>          | LS_GLEAN_10003514 | TCGTCGGAGGGTATGAATGC    | AACTTGGATGCGGGACTTGT   |
| <i>muc2</i>          | LS_GLEAN_10008706 | ATCCGCAATGGACAAGTGGT    | CTCTGTCGGATCTGGACTGC   |
| <i>slc6a19</i>       | LS_GLEAN_10011640 | TGCCTCTATGCTGGTCTCCT    | TTAGGGCCTCCCTGTACCA    |
| <i>cd36</i>          | LS_GLEAN_10003179 | ACGCCAGTCTACATCTCCCT    | GAGCGATGCAGTTGGCTCTA   |
| <i>apob-48</i>       | LS_GLEAN_10003911 | GATGCTCGTTTCCACTCCCA    | GCCGTACAGGGTTAGGTCAC   |
| <i>apoa-1</i>        | LS_GLEAN_10004674 | GGCTTTGCAGAACGATGCT     | CTTGACCTTGACTCGGCGT    |
| <i>gapdh</i>         |                   | GCATCGAGGAGGCACTCATGA   | TCAATGGTAAGCTGACAGGCAT |
| (Internal reference) |                   |                         |                        |

Table S2. Transcriptome sequencing quality indicators

| Sample | Total     | Raw | Total Clean | Total Clean | Clean   | Reads | Clean   | Reads | Clean     | Reads | Total Mapping (%) |
|--------|-----------|-----|-------------|-------------|---------|-------|---------|-------|-----------|-------|-------------------|
|        | Reads (M) |     | Reads (M)   | Bases (Gb)  | Q20 (%) |       | Q30 (%) |       | Ratio (%) |       |                   |
| KK1    | 67.47     |     | 64.19       | 6.42        | 98.15   |       | 91.82   |       | 95.15     |       | 76.86             |
| KK2    | 69.96     |     | 65.19       | 6.52        | 98.27   |       | 92.38   |       | 93.17     |       | 71.89             |
| KK3    | 67.47     |     | 64.13       | 6.41        | 98.13   |       | 91.73   |       | 95.05     |       | 75.12             |
| LC1    | 67.47     |     | 63.89       | 6.39        | 97.98   |       | 91.22   |       | 94.71     |       | 76.15             |
| LC2    | 67.47     |     | 62.75       | 6.28        | 97.98   |       | 91.33   |       | 93.01     |       | 75.63             |
| LC3    | 67.47     |     | 62.93       | 6.29        | 98.03   |       | 91.5    |       | 93.28     |       | 75.67             |
| PM1    | 69.96     |     | 66.23       | 6.62        | 97.98   |       | 91.18   |       | 94.66     |       | 75.19             |
| PM2    | 67.47     |     | 63.94       | 6.39        | 97.94   |       | 91.03   |       | 94.77     |       | 76.47             |
| PM3    | 64.97     |     | 61.67       | 6.17        | 98.04   |       | 91.43   |       | 94.93     |       | 77.51             |
| SL1    | 69.96     |     | 65.07       | 6.51        | 97.97   |       | 91.34   |       | 93.01     |       | 76.68             |
| SL2    | 69.96     |     | 65.23       | 6.52        | 98.12   |       | 91.82   |       | 93.23     |       | 76.94             |
| SL3    | 69.96     |     | 65.06       | 6.51        | 98.22   |       | 92.18   |       | 92.99     |       | 77.39             |
| YL1    | 69.96     |     | 64.37       | 6.44        | 98.08   |       | 91.62   |       | 92.01     |       | 76.89             |
| YL2    | 67.47     |     | 63.72       | 6.37        | 97.95   |       | 91.12   |       | 94.44     |       | 76.09             |
| YL3    | 69.96     |     | 65.08       | 6.51        | 97.98   |       | 91.39   |       | 93.02     |       | 75.73             |

Table S3. Genes and their expression levels in neuroactive ligand-receptor interaction pathway

| Gene ID           | Entry  | Name             | Transcription                                                | YL_FPKM | PM_FPKM | KK_FPKM | LC_FPKM | SL_FPKM |
|-------------------|--------|------------------|--------------------------------------------------------------|---------|---------|---------|---------|---------|
| LS_GLEAN_10017312 | K05202 | <i>grik2</i>     | <i>glutamate receptor, ionotropic kainate 2</i>              | 82.24   | 157.89  | 237.92  | 351.85  | 585.47  |
| LS_GLEAN_10006891 | K01312 | <i>prss1_2_3</i> | <i>trypsin [EC:3.4.21.4]</i>                                 | 1.49    | 49.35   | 201.63  | 158.47  | 501.44  |
| LS_GLEAN_10006894 | K01312 | <i>prss1_2_3</i> | <i>trypsin [EC:3.4.21.4]</i>                                 | 0.54    | 19.45   | 85.14   | 51.27   | 162.80  |
| LS_GLEAN_10018345 | K05198 | <i>gria2</i>     | <i>glutamate receptor 2</i>                                  | 56.62   | 85.55   | 130.04  | 122.95  | 157.92  |
| LS_GLEAN_10016340 | K01312 | <i>prss1_2_3</i> | <i>trypsin [EC:3.4.21.4]</i>                                 | 3.35    | 5.79    | 17.34   | 17.30   | 81.60   |
| LS_GLEAN_10008863 | K05208 | <i>grin1</i>     | <i>glutamate receptor, ionotropic, N-methyl D-aspartate1</i> | 12.36   | 18.94   | 24.42   | 38.70   | 69.35   |
| LS_GLEAN_10005848 | K05208 | <i>grin1</i>     | <i>glutamate receptor, ionotropic, N-methyl D-aspartate1</i> | 15.45   | 24.58   | 28.50   | 45.13   | 66.31   |
| LS_GLEAN_10008633 | K05199 | <i>gria3</i>     | <i>glutamate receptor 3</i>                                  | 20.05   | 25.49   | 34.56   | 34.04   | 61.41   |
| LS_GLEAN_10006913 | K05205 | <i>grik5</i>     | <i>glutamate receptor, ionotropic, kainate 5</i>             | 19.73   | 27.05   | 32.88   | 36.25   | 53.49   |
| LS_GLEAN_10010648 | K05198 | <i>gria2</i>     | <i>glutamate receptor, ionotropic, AMPA 2</i>                | 15.48   | 21.29   | 22.56   | 30.19   | 51.97   |
| LS_GLEAN_10021517 | K05262 | <i>adcyap</i>    | <i>pituitary adenylate cyclase-activating polypeptide</i>    | 17.93   | 30.70   | 31.26   | 47.60   | 47.29   |
| LS_GLEAN_10009205 | K05175 | <i>gabra</i>     | <i>gamma-aminobutyric acid receptor subunit alpha</i>        | 13.47   | 29.57   | 23.09   | 39.29   | 42.99   |
| LS_GLEAN_10016960 | K05262 | <i>adcyap</i>    | <i>pituitary adenylate cyclase-activating polypeptide</i>    | 14.72   | 26.67   | 23.90   | 39.50   | 42.28   |
| LS_GLEAN_10015956 | K12332 | <i>calca</i>     | <i>calcitonin</i>                                            | 3.38    | 8.61    | 21.27   | 20.70   | 41.16   |
| LS_GLEAN_10007003 | K04166 | <i>agtr1</i>     | <i>angiotensin II receptor, type 1</i>                       | 2.74    | 6.73    | 14.23   | 16.74   | 36.59   |
| LS_GLEAN_10002066 | K05051 | <i>taar</i>      | <i>trace amine associated receptor</i>                       | 16.15   | 18.23   | 17.13   | 17.11   | 35.88   |
| LS_GLEAN_10006272 | K05197 | <i>gria1</i>     | <i>glutamate receptor 1</i>                                  | 14.52   | 20.35   | 19.76   | 25.30   | 31.86   |
| LS_GLEAN_10015172 | K16367 | <i>edn2</i>      | <i>endothelin-2</i>                                          | 13.01   | 16.85   | 20.18   | 19.85   | 30.05   |
| LS_GLEAN_10010477 | K05080 | <i>ghr</i>       | <i>growth hormone receptor</i>                               | 9.31    | 6.56    | 11.57   | 12.02   | 28.31   |
| LS_GLEAN_10012515 | K05242 | <i>avp</i>       | <i>arginine vasopressin</i>                                  | 1.56    | 7.27    | 12.67   | 18.11   | 28.06   |
| LS_GLEAN_10010649 | K05196 | <i>glrb</i>      | <i>glycine receptor beta</i>                                 | 7.08    | 13.28   | 13.90   | 21.13   | 27.55   |
| LS_GLEAN_10011032 | K04146 | <i>drd3</i>      | <i>dopamine receptor D3</i>                                  | 5.87    | 9.63    | 13.78   | 12.35   | 27.37   |
| LS_GLEAN_10010186 | K04806 | <i>chrna4</i>    | <i>cholinergic receptor, nicotinic, alpha 4</i>              | 11.01   | 10.17   | 14.51   | 13.73   | 25.55   |

Continued in the following page

Table S3. Continued

| Gene ID           | Entry  | Name            | Transcription                                                | YL_FPKM | PM_FPKM | KK_FPKM | LC_FPKM | SL_FPKM |
|-------------------|--------|-----------------|--------------------------------------------------------------|---------|---------|---------|---------|---------|
| LS_GLEAN_10019467 | K05184 | <i>gabrd</i>    | <i>gamma-aminobutyric acid type A receptor subunit delta</i> | 0.98    | 5.39    | 10.32   | 17.54   | 25.31   |
| BGI_novel_G002312 | K04291 | <i>lpar2</i>    | <i>lysophosphatidic acid receptor 2</i>                      | 1.69    | 6.54    | 10.35   | 10.30   | 25.11   |
| LS_GLEAN_10004366 | K04608 | <i>grm6_7_8</i> | <i>glutamate receptor, metabotropic 6/7/8</i>                | 14.58   | 11.81   | 21.01   | 21.70   | 24.86   |
| LS_GLEAN_10012039 | K05199 | <i>gria3</i>    | <i>glutamate receptor 3</i>                                  | 7.90    | 12.89   | 9.83    | 20.05   | 24.61   |
| LS_GLEAN_10017859 | K04608 | <i>grm6_7_8</i> | <i>glutamate receptor, metabotropic 6/7/8</i>                | 9.42    | 15.28   | 13.31   | 24.00   | 24.47   |
| LS_GLEAN_10018361 | K04160 | <i>htr4</i>     | <i>5-hydroxytryptamine receptor 4</i>                        | 9.41    | 11.61   | 17.37   | 18.57   | 23.40   |
| LS_GLEAN_10007996 | K05438 | <i>gh</i>       | <i>growth hormone</i>                                        | 0.06    | 0.85    | 4.59    | 15.08   | 19.96   |
| LS_GLEAN_10020321 | K05264 | <i>vip</i>      | <i>vasoactive intestinal peptide</i>                         | 3.32    | 7.05    | 13.66   | 14.70   | 17.99   |
| LS_GLEAN_10012779 | K05193 | <i>glra1</i>    | <i>glycine receptor alpha-1</i>                              | 6.74    | 11.30   | 10.22   | 18.40   | 17.53   |
| LS_GLEAN_10017489 | K05246 | <i>hcrt</i>     | <i>hypocretin (orexin) neuropeptide</i>                      | 7.76    | 10.72   | 12.06   | 15.79   | 17.39   |
| LS_GLEAN_10004629 | K04291 | <i>lpar2</i>    | <i>lysophosphatidic acid receptor 2</i>                      | 1.60    | 3.85    | 6.07    | 6.97    | 17.30   |
| LS_GLEAN_10017860 | K04608 | <i>grm6_7_8</i> | <i>glutamate receptor, metabotropic 6/7/8</i>                | 6.83    | 8.35    | 15.13   | 13.87   | 14.79   |
| LS_GLEAN_10016918 | K05207 | <i>grid2</i>    | <i>glutamate receptor, ionotropic, delta 2</i>               | 4.91    | 8.16    | 7.68    | 10.37   | 14.33   |
| LS_GLEAN_10010028 | K04234 | <i>f2rl1</i>    | <i>coagulation factor II (thrombin) receptor-like 1</i>      | 6.11    | 6.81    | 6.91    | 10.29   | 13.77   |
| BGI_novel_G002110 | K05181 | <i>gabrb</i>    | <i>gamma-aminobutyric acid receptor subunit beta</i>         | 2.00    | 4.96    | 9.26    | 12.80   | 13.64   |
| LS_GLEAN_10011681 | K05248 | <i>uts2</i>     | <i>urotensin 2</i>                                           | 4.14    | 6.64    | 6.97    | 11.56   | 13.61   |
| LS_GLEAN_10006662 | K05081 | <i>prlr</i>     | <i>prolactin receptor</i>                                    | 4.53    | 7.22    | 10.08   | 8.84    | 13.52   |
| LS_GLEAN_10012741 | K04615 | <i>gabbr</i>    | <i>gamma-aminobutyric acid (GABA) B receptor</i>             | 2.62    | 6.32    | 6.71    | 11.17   | 13.32   |
| LS_GLEAN_10005105 | K04145 | <i>drd2</i>     | <i>dopamine receptor D2</i>                                  | 4.16    | 6.61    | 8.70    | 9.57    | 12.37   |
| LS_GLEAN_10013708 | K04608 | <i>grm6_7_8</i> | <i>glutamate receptor, metabotropic 6/7/8</i>                | 4.77    | 9.16    | 9.56    | 13.01   | 12.08   |
| LS_GLEAN_10015730 | K05227 | <i>edn3</i>     | <i>endothelin-3</i>                                          | 5.84    | 7.30    | 7.36    | 8.61    | 11.82   |
| LS_GLEAN_10018635 | K05840 | <i>drd5</i>     | <i>dopamine receptor D5</i>                                  | 2.35    | 4.37    | 9.34    | 6.99    | 11.37   |
| LS_GLEAN_10012994 | K04010 | <i>c5ar1</i>    | <i>complement C5a receptor 1</i>                             | 1.85    | 2.89    | 6.04    | 4.30    | 10.94   |

Continued in the following page

Table S3. Continued

| Gene ID           | Entry  | Name             | Transcription                                         | YL_FPKM | PM_FPKM | KK_FPKM | LC_FPKM | SL_FPKM |
|-------------------|--------|------------------|-------------------------------------------------------|---------|---------|---------|---------|---------|
| LS_GLEAN_10016682 | K05244 | <i>gal</i>       | <i>galanin</i>                                        | 2.23    | 3.21    | 4.67    | 10.04   | 10.60   |
| BGI_novel_G001577 | K01312 | <i>prss1_2_3</i> | <i>trypsin [EC:3.4.21.4]</i>                          | 0.14    | 0.19    | 1.04    | 3.31    | 10.24   |
| BGI_novel_G001010 | K04608 | <i>grm6_7_8</i>  | <i>glutamate receptor, metabotropic 6/7/8</i>         | 2.49    | 5.40    | 8.01    | 8.43    | 10.01   |
| LS_GLEAN_10010419 | K05186 | <i>gabrg</i>     | <i>gamma-aminobutyric acid receptor subunit gamma</i> | 3.43    | 6.47    | 5.54    | 10.48   | 9.35    |
| LS_GLEAN_10016412 | K05228 | <i>pomc</i>      | <i>proopiomelanocortin</i>                            | 2.06    | 4.51    | 3.08    | 10.39   | 9.05    |
| LS_GLEAN_10015317 | K05194 | <i>glra2</i>     | <i>glycine receptor alpha-2</i>                       | 2.87    | 5.22    | 5.01    | 7.34    | 8.90    |
| LS_GLEAN_10014084 | K12332 | <i>calca</i>     | <i>calcitonin</i>                                     | 2.38    | 3.10    | 4.82    | 5.62    | 8.63    |
| LS_GLEAN_10008216 | K05226 | <i>cck</i>       | <i>cholecystokinin</i>                                | 4.18    | 3.61    | 3.47    | 5.66    | 8.47    |
| LS_GLEAN_10016432 | K05181 | <i>gabrb</i>     | <i>gamma-aminobutyric acid receptor subunit beta</i>  | 3.00    | 6.71    | 6.24    | 11.94   | 8.30    |
| LS_GLEAN_10013080 | K05202 | <i>grik2</i>     | <i>glutamate receptor, ionotropic kainate 2</i>       | 1.40    | 2.41    | 2.42    | 4.28    | 8.30    |
| LS_GLEAN_10015429 | K04306 | <i>rxfp1</i>     | <i>relaxin family peptide receptor 1</i>              | 1.30    | 1.85    | 2.63    | 3.67    | 8.09    |
| LS_GLEAN_10016433 | K05175 | <i>gabra</i>     | <i>gamma-aminobutyric acid receptor subunit alpha</i> | 2.48    | 5.10    | 5.13    | 6.75    | 8.07    |
| LS_GLEAN_10013591 | K05206 | <i>grid1</i>     | <i>glutamate receptor, ionotropic, delta 1</i>        | 2.01    | 2.88    | 3.62    | 4.45    | 8.06    |
| LS_GLEAN_10010985 | K05256 | <i>crh</i>       | <i>corticotropin-releasing hormone</i>                | 1.40    | 3.70    | 3.61    | 10.94   | 8.04    |
| LS_GLEAN_10015436 | K04210 | <i>gpr83</i>     | <i>G protein-coupled receptor 83</i>                  | 3.74    | 5.05    | 4.93    | 8.16    | 7.75    |
| LS_GLEAN_10000045 | K05081 | <i>prlr</i>      | <i>prolactin receptor</i>                             | 2.53    | 3.04    | 3.57    | 5.07    | 7.60    |
| LS_GLEAN_10012963 | K05175 | <i>gabra</i>     | <i>gamma-aminobutyric acid receptor subunit alpha</i> | 1.60    | 3.81    | 2.73    | 7.57    | 7.24    |
| LS_GLEAN_10019047 | K05190 | <i>gabrr</i>     | <i>gamma-aminobutyric acid receptor subunit rho</i>   | 2.24    | 2.94    | 4.31    | 5.36    | 6.83    |
| LS_GLEAN_10013733 | K23143 | <i>pth2</i>      | <i>parathyroid hormone 2</i>                          | 1.79    | 2.74    | 2.87    | 3.39    | 6.81    |
| LS_GLEAN_10020154 | K04813 | <i>chrna2</i>    | <i>cholinergic receptor, nicotinic, alpha 2</i>       | 3.27    | 4.43    | 4.04    | 7.15    | 6.78    |
| BGI_novel_G003280 | K05771 | <i>nr3c1</i>     | <i>glucocorticoid receptor</i>                        | 2.15    | 2.57    | 3.58    | 4.25    | 6.32    |
| BGI_novel_G001024 | K08377 | <i>npbwr2</i>    | <i>neuropeptides B/W receptor 2</i>                   | 1.97    | 3.87    | 3.44    | 6.71    | 6.13    |
| LS_GLEAN_10003663 | K01312 | <i>prss1_2_3</i> | <i>trypsin [EC:3.4.21.4]</i>                          | 2.61    | 2.03    | 2.61    | 2.64    | 6.07    |

Continued in the following page

Table S3. Continued

| Gene ID           | Entry  | Name          | Transcription                                                  | YL_FPKM | PM_FPKM | KK_FPKM | LC_FPKM | SL_FPKM |
|-------------------|--------|---------------|----------------------------------------------------------------|---------|---------|---------|---------|---------|
| LS_GLEAN_10012659 | K04306 | <i>rxfp1</i>  | <i>relaxin family peptide receptor 1</i>                       | 0.72    | 1.73    | 2.24    | 2.81    | 5.94    |
| LS_GLEAN_10011387 | K05175 | <i>gabra</i>  | <i>gamma-aminobutyric acid receptor subunit alpha</i>          | 1.25    | 3.55    | 3.24    | 7.07    | 5.91    |
| LS_GLEAN_10007860 | K04204 | <i>npy1r</i>  | <i>neuropeptide Y receptor Y1</i>                              | 2.19    | 3.10    | 2.51    | 3.01    | 5.74    |
| LS_GLEAN_10018142 | K04809 | <i>chrna7</i> | <i>cholinergic receptor, nicotinic, alpha 7</i>                | 1.67    | 3.31    | 3.97    | 3.72    | 5.46    |
| LS_GLEAN_10015778 | K05206 | <i>grid1</i>  | <i>glutamate receptor, ionotropic, delta 1</i>                 | 1.70    | 3.22    | 3.48    | 4.19    | 5.42    |
| LS_GLEAN_10013475 | K05213 | <i>grin3a</i> | <i>glutamate receptor, ionotropic, N-methyl-D-aspartate 3A</i> | 2.46    | 2.40    | 3.11    | 3.23    | 5.35    |
| LS_GLEAN_10020896 | K05189 | <i>gabrp</i>  | <i>gamma-aminobutyric acid receptor subunit pi</i>             | 0.46    | 2.02    | 2.52    | 5.87    | 5.26    |
| LS_GLEAN_10005468 | K22000 | <i>rln3</i>   | <i>relaxin 3</i>                                               | 0.99    | 0.98    | 3.28    | 5.55    | 5.17    |
| LS_GLEAN_10013562 | K04215 | <i>oprm1</i>  | <i>opioid receptor, mu 1</i>                                   | 1.35    | 2.98    | 2.80    | 4.09    | 5.12    |
| LS_GLEAN_10015346 | K04586 | <i>pthr2</i>  | <i>parathyroid hormone receptor 2</i>                          | 0.97    | 1.35    | 1.90    | 1.86    | 5.11    |
| LS_GLEAN_10020897 | K05189 | <i>gabrp</i>  | <i>gamma-aminobutyric acid receptor subunit pi</i>             | 0.54    | 1.80    | 1.92    | 2.78    | 4.87    |
| LS_GLEAN_10005935 | K04605 | <i>grm2_3</i> | <i>glutamate receptor, metabotropic 2/3</i>                    | 1.78    | 3.05    | 2.79    | 4.46    | 4.79    |
| LS_GLEAN_10017389 | K18832 | <i>penka</i>  | <i>proenkephalin a</i>                                         | 1.31    | 2.65    | 3.08    | 6.21    | 4.79    |
| LS_GLEAN_10018556 | K04579 | <i>crhr2</i>  | <i>corticotropin releasing hormone receptor 2</i>              | 1.41    | 1.99    | 1.41    | 2.68    | 4.77    |
| BGI_novel_G002458 | K05175 | <i>gabra</i>  | <i>gamma-aminobutyric acid receptor subunit alpha</i>          | 2.36    | 2.25    | 5.43    | 4.38    | 4.74    |
| BGI_novel_G000534 | K05051 | <i>taar</i>   | <i>trace amine associated receptor</i>                         | 1.36    | 2.49    | 3.58    | 5.33    | 4.57    |
| LS_GLEAN_10017901 | K05185 | <i>gabre</i>  | <i>gamma-aminobutyric acid receptor subunit epsilon</i>        | 2.42    | 2.10    | 2.16    | 3.38    | 4.55    |
| LS_GLEAN_10019482 | K04216 | <i>oprl1</i>  | <i>opiate receptor-like 1</i>                                  | 1.75    | 2.85    | 2.23    | 4.31    | 4.48    |
| LS_GLEAN_10009352 | K04583 | <i>gcgr</i>   | <i>glucagon receptor</i>                                       | 1.37    | 1.62    | 2.80    | 3.23    | 4.42    |
| LS_GLEAN_10014586 | K05237 | <i>sst</i>    | <i>somatostatin</i>                                            | 1.79    | 2.45    | 3.29    | 5.45    | 4.25    |
| LS_GLEAN_10020155 | K04808 | <i>chrna6</i> | <i>cholinergic receptor, nicotinic, alpha 6</i>                | 1.31    | 1.26    | 1.52    | 1.54    | 3.95    |
| LS_GLEAN_10005547 | K04280 | <i>gnrhr</i>  | <i>gonadotropin-releasing hormone receptor</i>                 | 1.17    | 1.40    | 1.31    | 1.95    | 3.79    |
| LS_GLEAN_10010069 | K04580 | <i>gipr</i>   | <i>gastric inhibitory polypeptide receptor</i>                 | 1.34    | 0.96    | 2.08    | 1.77    | 3.72    |

Continued in the following page

Table S3. Continued

| Gene ID           | Entry  | Name             | Transcription                                                  | YL_FPKM | PM_FPKM | KK_FPKM | LC_FPKM | SL_FPKM |
|-------------------|--------|------------------|----------------------------------------------------------------|---------|---------|---------|---------|---------|
| LS_GLEAN_10000772 | K04608 | <i>grm6_7_8</i>  | <i>glutamate receptor, metabotropic 6/7/8</i>                  | 1.62    | 2.76    | 2.60    | 3.34    | 3.71    |
| BGI_novel_G001578 | K01312 | <i>prss1_2_3</i> | <i>trypsin [EC:3.4.21.4]</i>                                   | 0.42    | 0.93    | 1.31    | 2.19    | 3.56    |
| LS_GLEAN_10018145 | K04808 | <i>chrna6</i>    | <i>cholinergic receptor, nicotinic, alpha 6</i>                | 1.16    | 1.31    | 1.47    | 2.40    | 3.55    |
| LS_GLEAN_10021534 | K05269 | <i>prlh</i>      | <i>prolactin releasing hormone</i>                             | 1.61    | 2.68    | 2.51    | 4.91    | 3.48    |
| LS_GLEAN_10011144 | K05217 | <i>p2rx3</i>     | <i>P2X purinoceptor 3</i>                                      | 1.44    | 2.00    | 1.62    | 4.65    | 3.45    |
| LS_GLEAN_10019312 | K04811 | <i>chrna10</i>   | <i>cholinergic receptor, nicotinic, alpha 10</i>               | 0.95    | 1.67    | 1.44    | 2.67    | 3.44    |
| LS_GLEAN_10015412 | K05271 | <i>glra4</i>     | <i>glycine receptor alpha-4</i>                                | 0.37    | 0.80    | 1.37    | 1.89    | 3.28    |
| LS_GLEAN_10019971 | K05235 | <i>nts</i>       | <i>neurotensin</i>                                             | 1.01    | 2.05    | 1.72    | 3.28    | 3.28    |
| BGI_novel_G002618 | K05051 | <i>taar</i>      | <i>trace amine associated receptor</i>                         | 0.90    | 2.46    | 2.51    | 4.24    | 3.18    |
| BGI_novel_G002492 | K04804 | <i>chrna2</i>    | <i>cholinergic receptor, nicotinic, alpha 2</i>                | 0.88    | 0.95    | 1.03    | 1.41    | 3.16    |
| LS_GLEAN_10018270 | K04160 | <i>htr4</i>      | <i>5-hydroxytryptamine receptor 4</i>                          | 0.36    | 0.77    | 1.70    | 3.17    | 3.08    |
| LS_GLEAN_10018926 | K05190 | <i>gabrr</i>     | <i>gamma-aminobutyric acid receptor subunit rho</i>            | 0.86    | 1.53    | 1.89    | 2.52    | 2.93    |
| LS_GLEAN_10019827 | K04217 | <i>sstr1</i>     | <i>somatostatin receptor 1</i>                                 | 1.09    | 1.92    | 1.90    | 2.58    | 2.88    |
| LS_GLEAN_10019046 | K05190 | <i>gabrr</i>     | <i>gamma-aminobutyric acid receptor subunit rho</i>            | 1.05    | 1.39    | 2.55    | 2.13    | 2.82    |
| LS_GLEAN_10015763 | K04131 | <i>chrm3</i>     | <i>muscarinic acetylcholine receptor M3</i>                    | 0.54    | 1.31    | 1.23    | 2.34    | 2.73    |
| LS_GLEAN_10014791 | K05217 | <i>p2rx3</i>     | <i>P2X purinoceptor 3</i>                                      | 0.77    | 0.91    | 0.85    | 1.72    | 2.68    |
| LS_GLEAN_10012049 | K04273 | <i>p2ry5</i>     | <i>lysophosphatidic acid receptor 6</i>                        | 0.63    | 1.31    | 1.74    | 2.95    | 2.66    |
| LS_GLEAN_10012917 | K05214 | <i>grin3b</i>    | <i>glutamate receptor, ionotropic, N-methyl-D-aspartate 3B</i> | 0.75    | 1.14    | 1.62    | 1.80    | 2.63    |
| LS_GLEAN_10012320 | K01312 | <i>prss1_2_3</i> | <i>trypsin [EC:3.4.21.4]</i>                                   | 0.00    | 0.63    | 1.12    | 2.33    | 2.56    |
| LS_GLEAN_10014905 | K04202 | <i>mc4r</i>      | <i>melanocortin 4 receptor</i>                                 | 1.16    | 1.33    | 1.12    | 2.57    | 2.48    |
| LS_GLEAN_10001052 | K05439 | <i>prl</i>       | <i>prolactin</i>                                               | 0.48    | 0.68    | 1.08    | 1.53    | 2.42    |
| LS_GLEAN_10014119 | K04204 | <i>npy1r</i>     | <i>neuropeptide Y receptor Y1</i>                              | 0.42    | 1.34    | 1.20    | 2.32    | 2.25    |
| LS_GLEAN_10018122 | K05211 | <i>grin2c</i>    | <i>glutamate receptor, ionotropic, N-methyl-D-aspartate 2C</i> | 0.64    | 0.99    | 0.66    | 1.42    | 2.13    |

Continued in the following page

Table S3. Continued

| Gene ID           | Entry  | Name            | Transcription                                           | YL_FPKM | PM_FPKM | KK_FPKM | LC_FPKM | SL_FPKM |
|-------------------|--------|-----------------|---------------------------------------------------------|---------|---------|---------|---------|---------|
| LS_GLEAN_10001169 | K03914 | <i>f2rl1</i>    | <i>coagulation factor II (thrombin) receptor-like 1</i> | 0.87    | 0.99    | 1.08    | 2.08    | 2.10    |
| LS_GLEAN_10003376 | K04280 | <i>gnrhr</i>    | <i>gonadotropin-releasing hormone receptor</i>          | 0.47    | 0.70    | 1.41    | 1.61    | 2.09    |
| LS_GLEAN_10005143 | K04273 | <i>p2ry5</i>    | <i>lysophosphatidic acid receptor 6</i>                 | 0.62    | 1.14    | 1.59    | 2.08    | 2.08    |
| LS_GLEAN_10013678 | K04153 | <i>htr1</i>     | <i>5-hydroxytryptamine receptor 1</i>                   | 0.60    | 0.61    | 0.74    | 1.52    | 2.01    |
| LS_GLEAN_10010963 | K05267 | <i>npb</i>      | <i>preproneuropeptide B</i>                             | 0.44    | 0.57    | 0.97    | 1.32    | 1.96    |
| LS_GLEAN_10019514 | K04608 | <i>grm6_7_8</i> | <i>glutamate receptor, metabotropic 6/7/8</i>           | 0.71    | 1.19    | 1.00    | 1.99    | 1.86    |
| LS_GLEAN_10013660 | K04153 | <i>htr1</i>     | <i>5-hydroxytryptamine receptor 1</i>                   | 0.56    | 1.25    | 1.06    | 2.12    | 1.80    |
| LS_GLEAN_10009600 | K05232 | <i>npy</i>      | <i>neuropeptide Y</i>                                   | 0.60    | 0.78    | 0.71    | 1.15    | 1.78    |
| LS_GLEAN_10020234 | K05189 | <i>gabrp</i>    | <i>gamma-aminobutyric acid receptor subunit pi</i>      | 0.21    | 1.04    | 1.03    | 2.16    | 1.72    |
| LS_GLEAN_10011949 | K04322 | <i>cysltr1</i>  | <i>cysteinyl leukotriene receptor 1</i>                 | 0.81    | 0.79    | 1.08    | 1.59    | 1.63    |

Table S4. Supplement excel file including Gene Ontology (GO) and Kyoto Encyclopedia of Genes and Genomes (KEGG) enrichment analyses of genes in the target module (brown, red, purple, grey, cyan, pink, lightcyan, yellow, turquoise module).

Table S5. List of hub genes associated with early development in clearhead icefish

| Module color | Gene ID           | Name               | Description                                                | YL FPKM | PM FPKM | KK FPKM | LC FPKM | SL FPKM |
|--------------|-------------------|--------------------|------------------------------------------------------------|---------|---------|---------|---------|---------|
| brown        | LS_GLEAN_10005367 | <i>ccnd2</i>       | <i>cyclin D2</i>                                           | 5.82    | 3.21    | 0.94    | 0.35    | 0.14    |
| brown        | LS_GLEAN_10008873 | <i>actb_g1</i>     | <i>actin beta/gamma 1</i>                                  | 8.04    | 19.21   | 47.25   | 47.17   | 67.88   |
| brown        | LS_GLEAN_10013198 | <i>seh1l</i>       | <i>nucleoporin SEH1</i>                                    | 49.76   | 36.17   | 27.96   | 23.52   | 16.41   |
| brown        | LS_GLEAN_10019617 | <i>parp</i>        | <i>poly (ADP-ribose) polymerase [EC:2.4.2.30]</i>          | 12.03   | 8.12    | 7.43    | 6.15    | 5.06    |
| red          | LS_GLEAN_10005911 | <i>ppp1r12c</i>    | <i>protein phosphatase 1, regulatory subunit 12C</i>       | 51.03   | 33.81   | 38.18   | 26.54   | 33.12   |
| red          | LS_GLEAN_10010320 | <i>ankrd28</i>     | <i>ankyrin repeat domain 28</i>                            | 21.33   | 14.72   | 15.00   | 11.79   | 13.29   |
| red          | LS_GLEAN_10017132 | <i>arf4</i>        | <i>ADP-ribosylation factor 4</i>                           | 17.37   | 13.57   | 14.28   | 11.60   | 13.44   |
| red          | LS_GLEAN_10020492 | <i>kdm6a</i>       | <i>lysine (K)-specific demethylase 6A</i>                  | 81.31   | 46.60   | 57.51   | 38.21   | 53.66   |
| purple       | LS_GLEAN_10003784 | <i>hce</i>         | <i>choriolysin H [EC:3.4.24.67]</i>                        | 18.25   | 27.81   | 0.34    | 0.00    | 0.06    |
| purple       | LS_GLEAN_10007168 | <i>ptp4a</i>       | <i>protein tyrosine phosphatase type IVA [EC:3.1.3.48]</i> | 105.68  | 142.29  | 76.63   | 79.97   | 58.43   |
| purple       | LS_GLEAN_10015246 | <i>dlx3</i>        | <i>distal-less homeobox 3</i>                              | 8.69    | 10.87   | 4.22    | 2.36    | 2.90    |
| purple       | LS_GLEAN_10016803 | <i>pak3</i>        | <i>p21-activated kinase 3 [EC:2.7.11.1]</i>                | 43.07   | 47.37   | 26.60   | 32.48   | 26.20   |
| grey         | LS_GLEAN_10003831 | <i>myl1</i>        | <i>myosin light chain 1</i>                                | 836.08  | 723.24  | 824.87  | 865.29  | 733.70  |
| grey         | LS_GLEAN_10004958 | <i>slc7a8</i>      | <i>solute carrier family 7, member 8</i>                   | 9.50    | 8.05    | 20.55   | 13.96   | 13.60   |
| grey         | LS_GLEAN_10015489 | <i>dgat2</i>       | <i>diacylglycerol O-acyltransferase 2</i>                  | 14.96   | 5.99    | 13.17   | 13.40   | 9.17    |
| grey         | LS_GLEAN_10016116 | <i>tas1r1</i>      | <i>taste receptor, type 1, member 1</i>                    | 9.01    | 11.44   | 9.27    | 8.81    | 11.35   |
| cyan         | LS_GLEAN_10009026 | <i>atp9</i>        | <i>F-type H+-transporting ATPase subunit c</i>             | 457.75  | 585.42  | 784.27  | 655.88  | 531.12  |
| cyan         | LS_GLEAN_10016443 | <i>inpp4</i>       | <i>inositol polyphosphate-4-phosphatase [EC:3.1.3.66]</i>  | 14.28   | 10.25   | 8.01    | 8.46    | 9.43    |
| cyan         | LS_GLEAN_10019724 | <i>trav</i>        | <i>T cell receptor alpha chain V region</i>                | 0.18    | 1.56    | 3.62    | 3.07    | 1.82    |
| pink         | LS_GLEAN_10006828 | <i>slc13a2_3_5</i> | <i>solute carrier family 13, member 2/3/5</i>              | 8.41    | 10.37   | 13.28   | 8.96    | 4.79    |
| pink         | LS_GLEAN_10014833 | <i>matn3</i>       | <i>matrilin-3</i>                                          | 7.17    | 5.34    | 4.68    | 5.83    | 8.49    |

Continued in the following page

Table S5. Continued

| Module color | Gene ID           | Name               | Description                                                      | YL FPKM | PM FPKM | KK FPKM | LC FPKM | SL FPKM |
|--------------|-------------------|--------------------|------------------------------------------------------------------|---------|---------|---------|---------|---------|
| pink         | LS_GLEAN_10007693 | <i>ndufa5</i>      | <i>NADH: ubiquinone oxidoreductase subunit A5</i>                | 219.40  | 245.60  | 267.11  | 294.43  | 160.97  |
| pink         | LS_GLEAN_10008321 | <i>lsc2</i>        | <i>succinyl-CoA synthetase beta subunit [EC:6.2.1.4 6.2.1.5]</i> | 198.80  | 210.65  | 241.38  | 204.10  | 131.15  |
| pink         | LS_GLEAN_10018065 | <i>foxk</i>        | <i>forkhead box K</i>                                            | 19.05   | 15.99   | 14.68   | 17.02   | 23.76   |
| lightcyan    | LS_GLEAN_10012933 | <i>mfge8</i>       | <i>lactadherin</i>                                               | 0.76    | 4.51    | 5.05    | 12.44   | 4.86    |
| lightcyan    | LS_GLEAN_10013102 | -                  | -                                                                | 3.84    | 9.36    | 5.03    | 12.74   | 6.77    |
| lightcyan    | LS_GLEAN_10016649 | <i>slc17a6_7_8</i> | <i>solute carrier family 17, member 6/7/8</i>                    | 2.52    | 8.98    | 8.33    | 16.31   | 8.69    |
| lightcyan    | LS_GLEAN_10018115 | <i>prph2</i>       | <i>peripherin-2</i>                                              | 0.47    | 5.60    | 6.18    | 23.27   | 9.45    |
| yellow       | LS_GLEAN_10010668 | <i>scn4b</i>       | <i>voltage-gated sodium channel type IV beta</i>                 | 4.50    | 6.41    | 6.48    | 13.22   | 13.49   |
| yellow       | LS_GLEAN_10012854 | <i>syt12</i>       | <i>synaptotagmin-12</i>                                          | 5.11    | 6.66    | 6.96    | 11.49   | 11.95   |
| yellow       | LS_GLEAN_10019403 | <i>sag</i>         | <i>S-antigen</i>                                                 | 0.88    | 2.19    | 3.50    | 7.15    | 7.67    |
| yellow       | LS_GLEAN_10020896 | <i>gabrp</i>       | <i>gamma-aminobutyric acid receptor subunit pi</i>               | 0.46    | 2.02    | 2.52    | 5.87    | 5.26    |
| turquoise    | LS_GLEAN_10007396 | <i>chd3</i>        | <i>chromodomain-helicase-DNA-binding protein 3 [EC:3.6.4.12]</i> | 3.06    | 4.73    | 5.98    | 7.62    | 15.63   |
| turquoise    | LS_GLEAN_10014535 | <i>nlgn</i>        | <i>neuroligin</i>                                                | 3.19    | 5.56    | 8.43    | 7.55    | 13.58   |
| turquoise    | LS_GLEAN_10016477 | <i>slc7a8</i>      | <i>solute carrier family 7, member 8</i>                         | 2.76    | 4.78    | 8.51    | 8.38    | 15.52   |
| turquoise    | LS_GLEAN_10015133 | <i>tspan4</i>      | <i>tetraspanin-4</i>                                             | 5.53    | 10.80   | 14.68   | 20.26   | 27.08   |

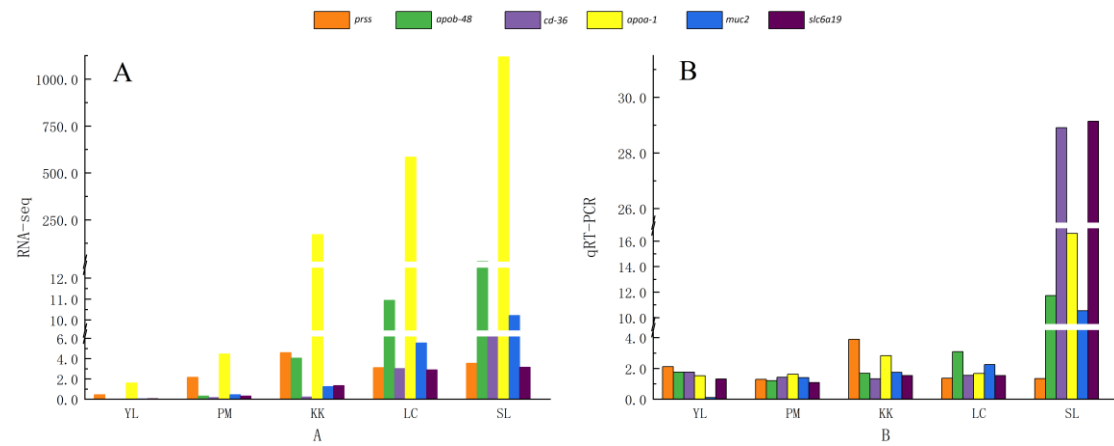

Figure S1. Real-time fluorescent quantitative PCR verification of RNA-seq results

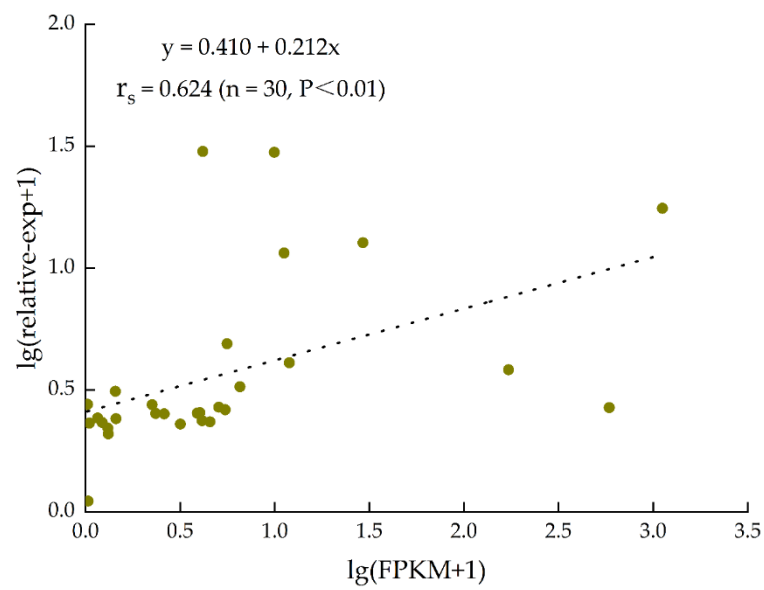

Figure S2. The correlations of quantitative real-time PCR (qRT-PCR) and RNA-seq expression data (FPKM) of all chosen unigenes
